# Supplementary figures and images for: Insight into the nanostructure of anisotropic cellulose aerogels upon compression
Source: Royal Society of Chemistry journal article supplement (doi:10.1039/c9sm01422e), 2019-01-01

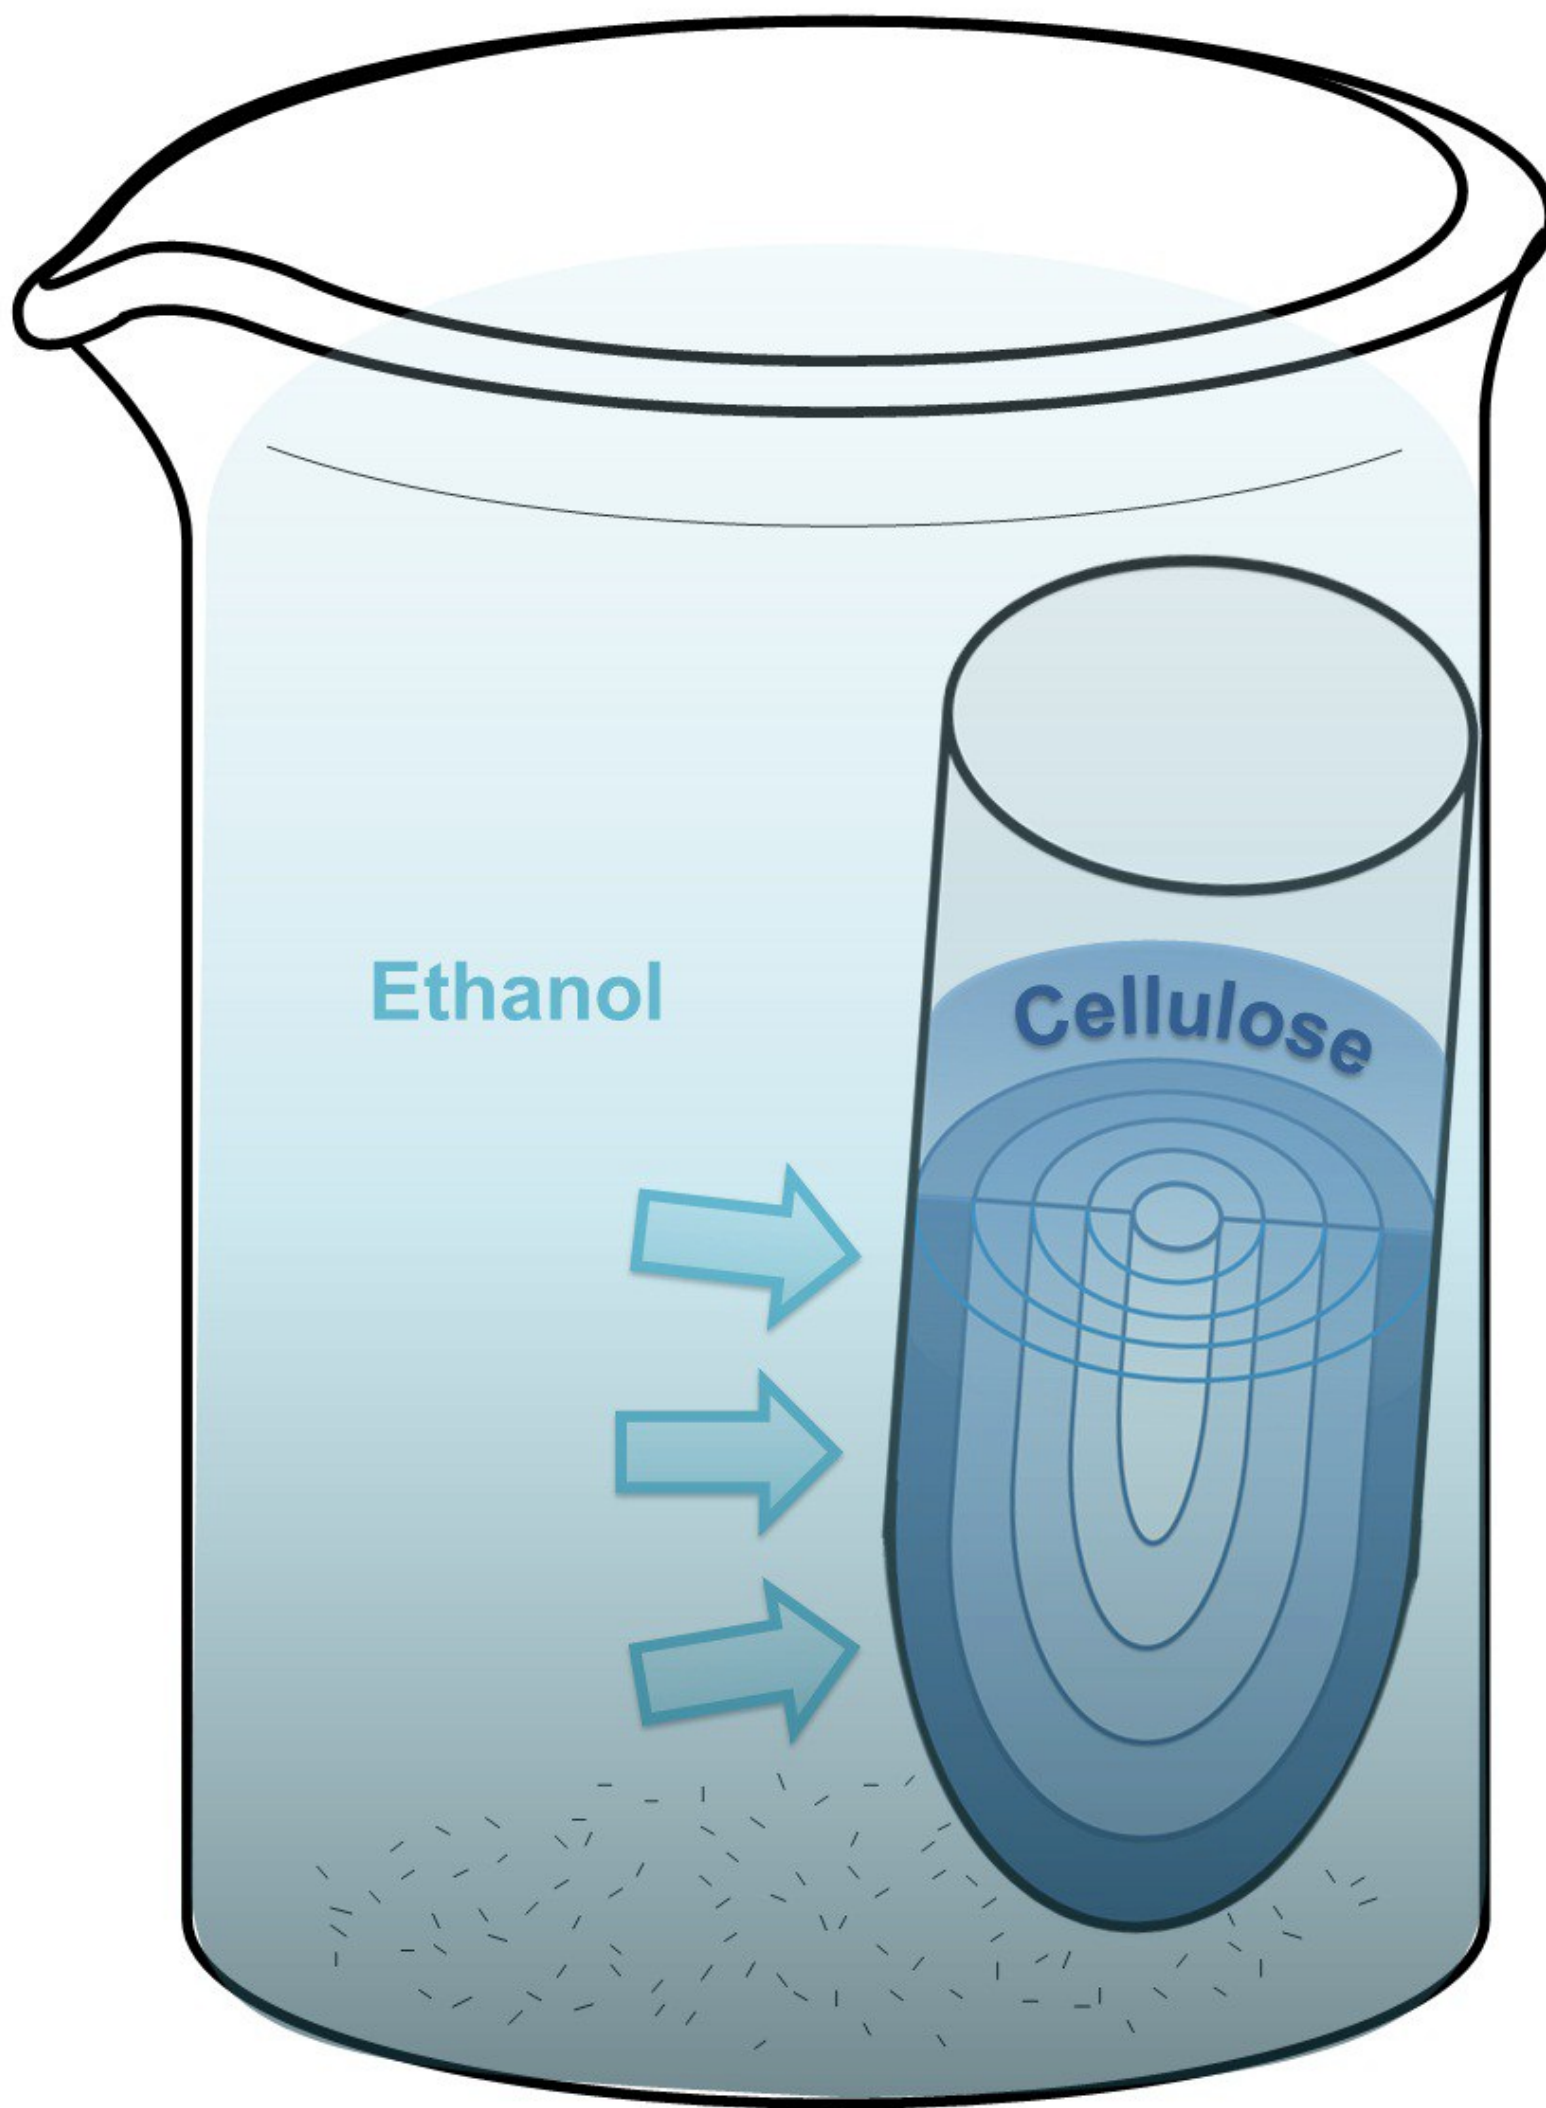

Supplement: c9sm01422e2.pdf [file c9sm01422e2.pdf]

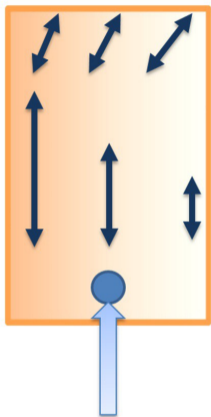

**X-Ray**

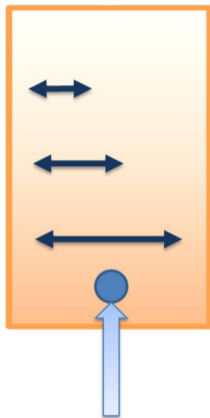

**X-Ray**

Supplement: c9sm01422e3.pdf [file c9sm01422e3.pdf]

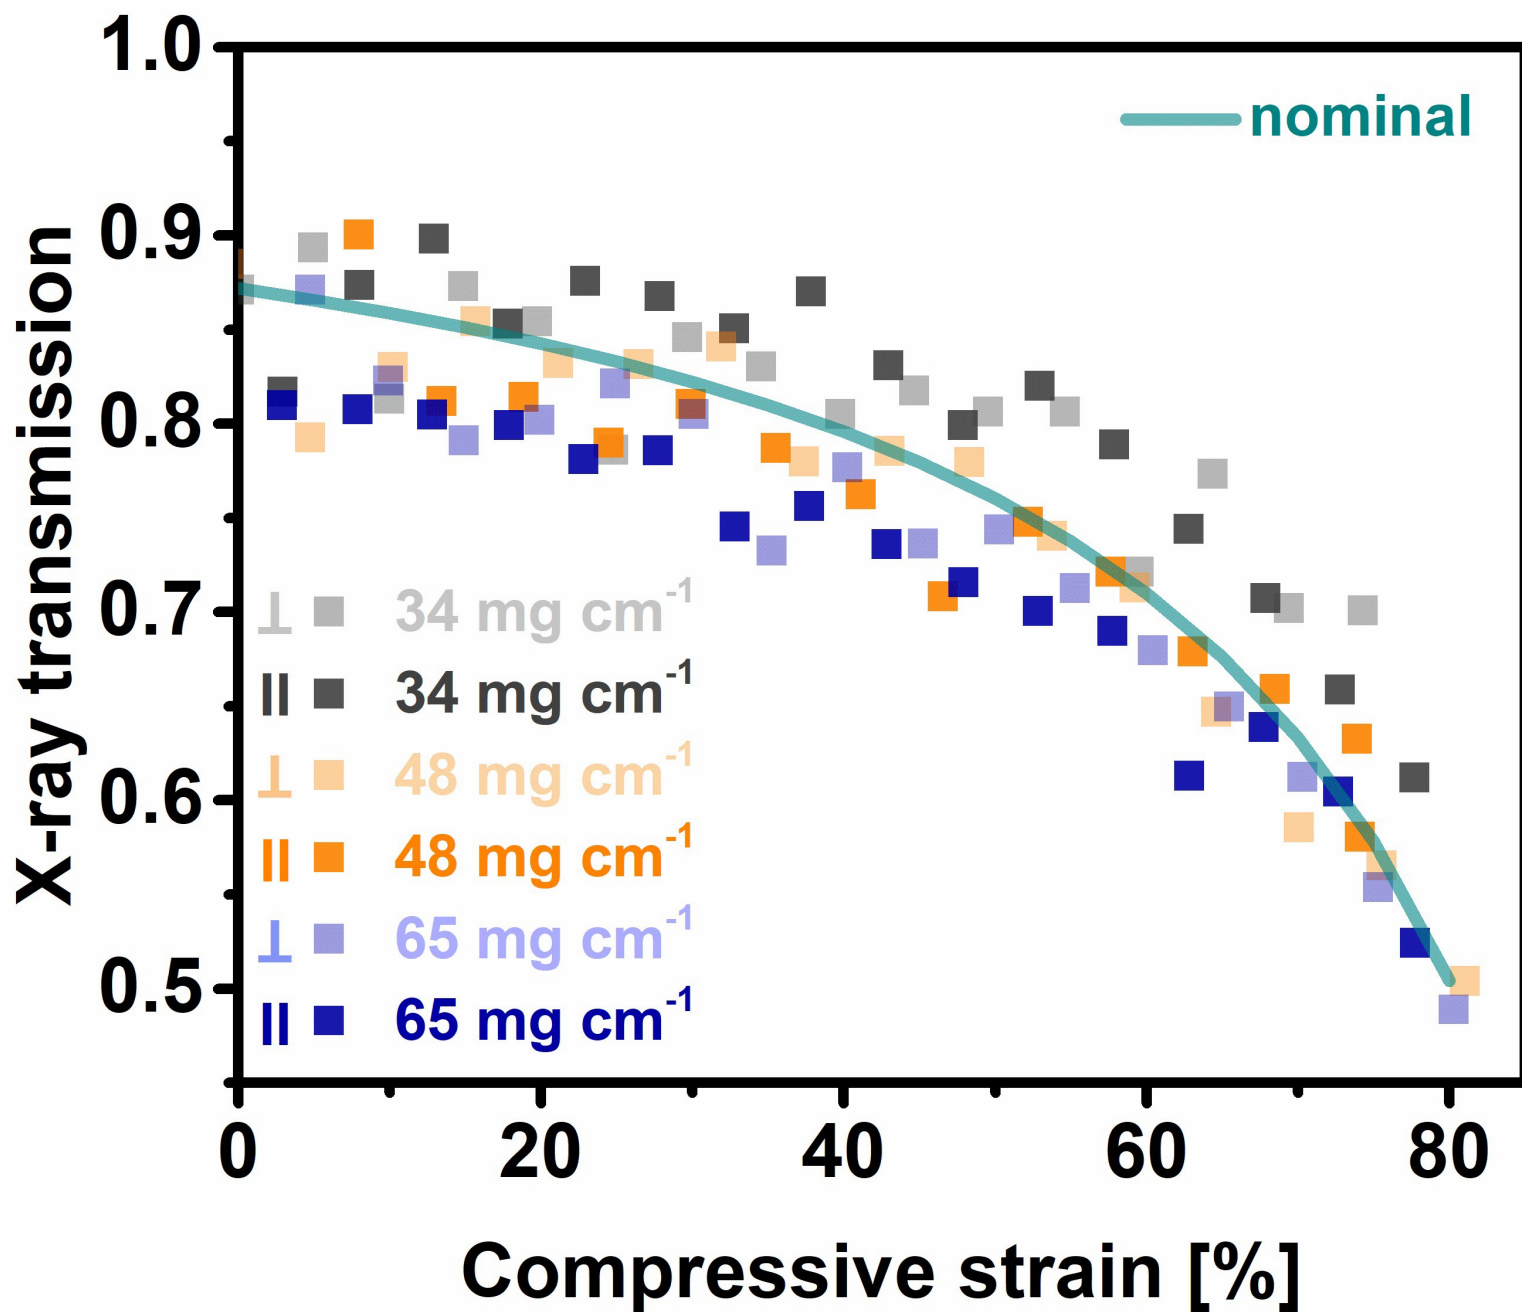

Supplement: c9sm01422e4.pdf [file c9sm01422e4.pdf]

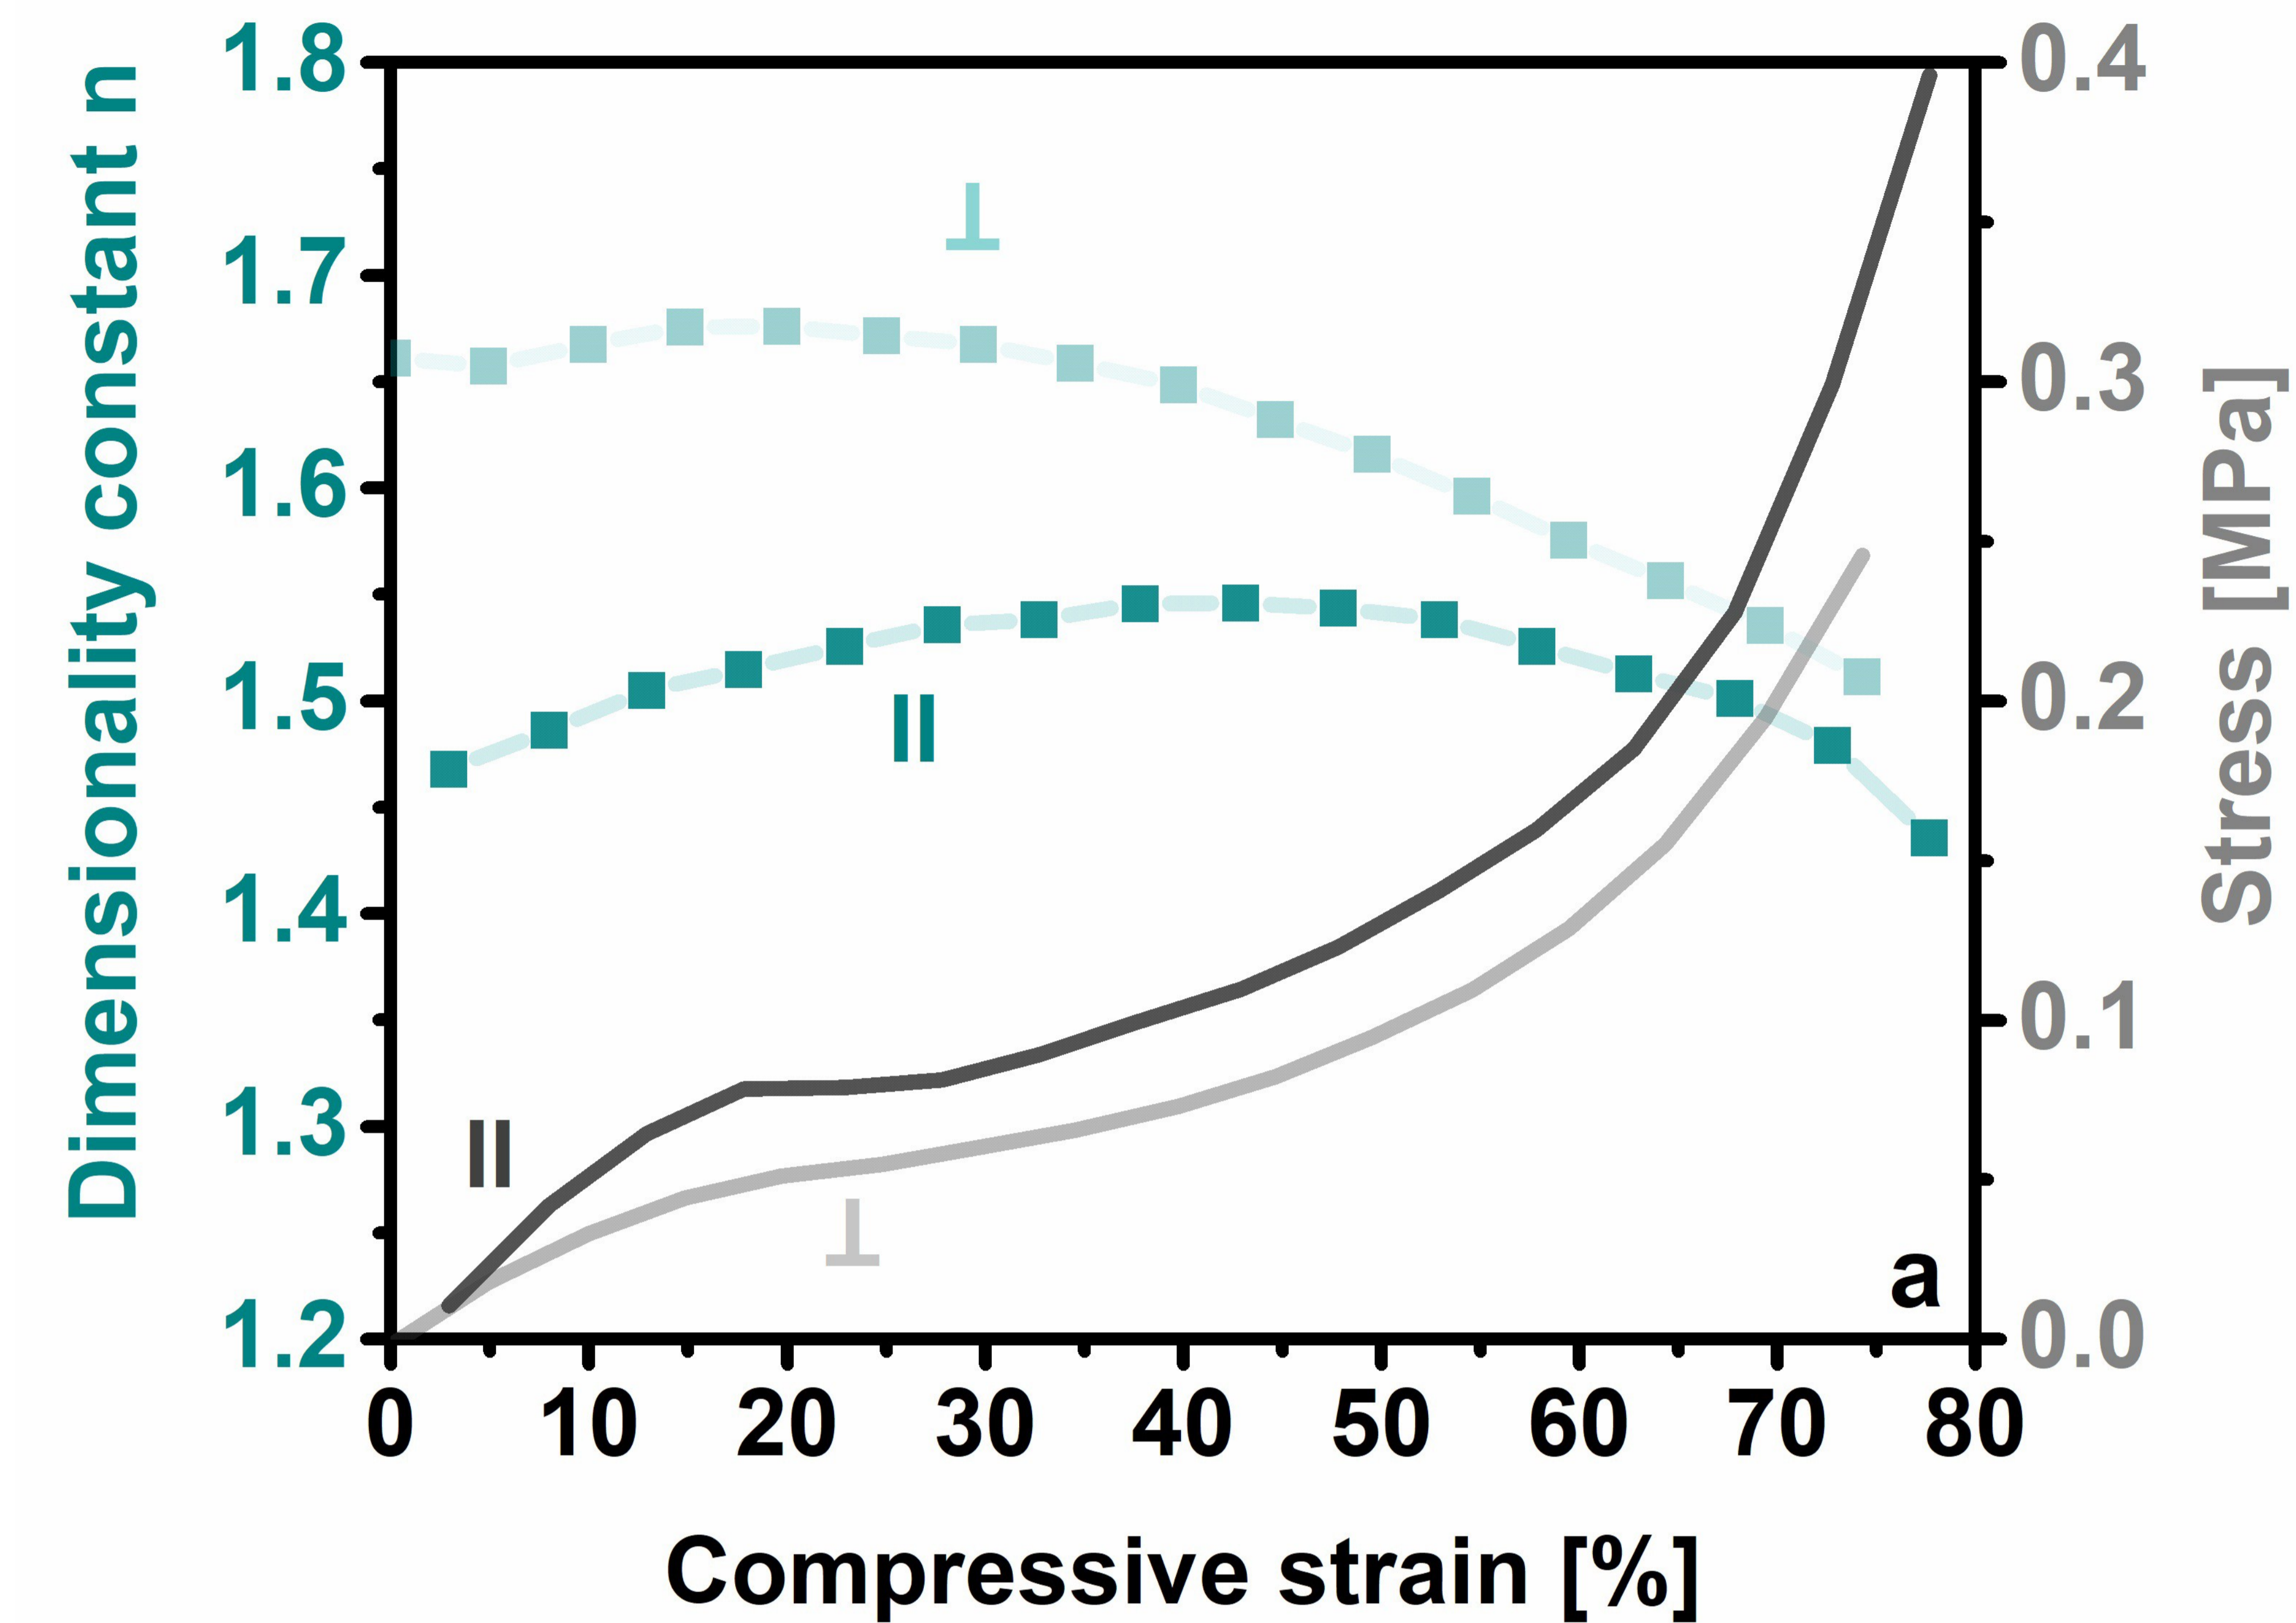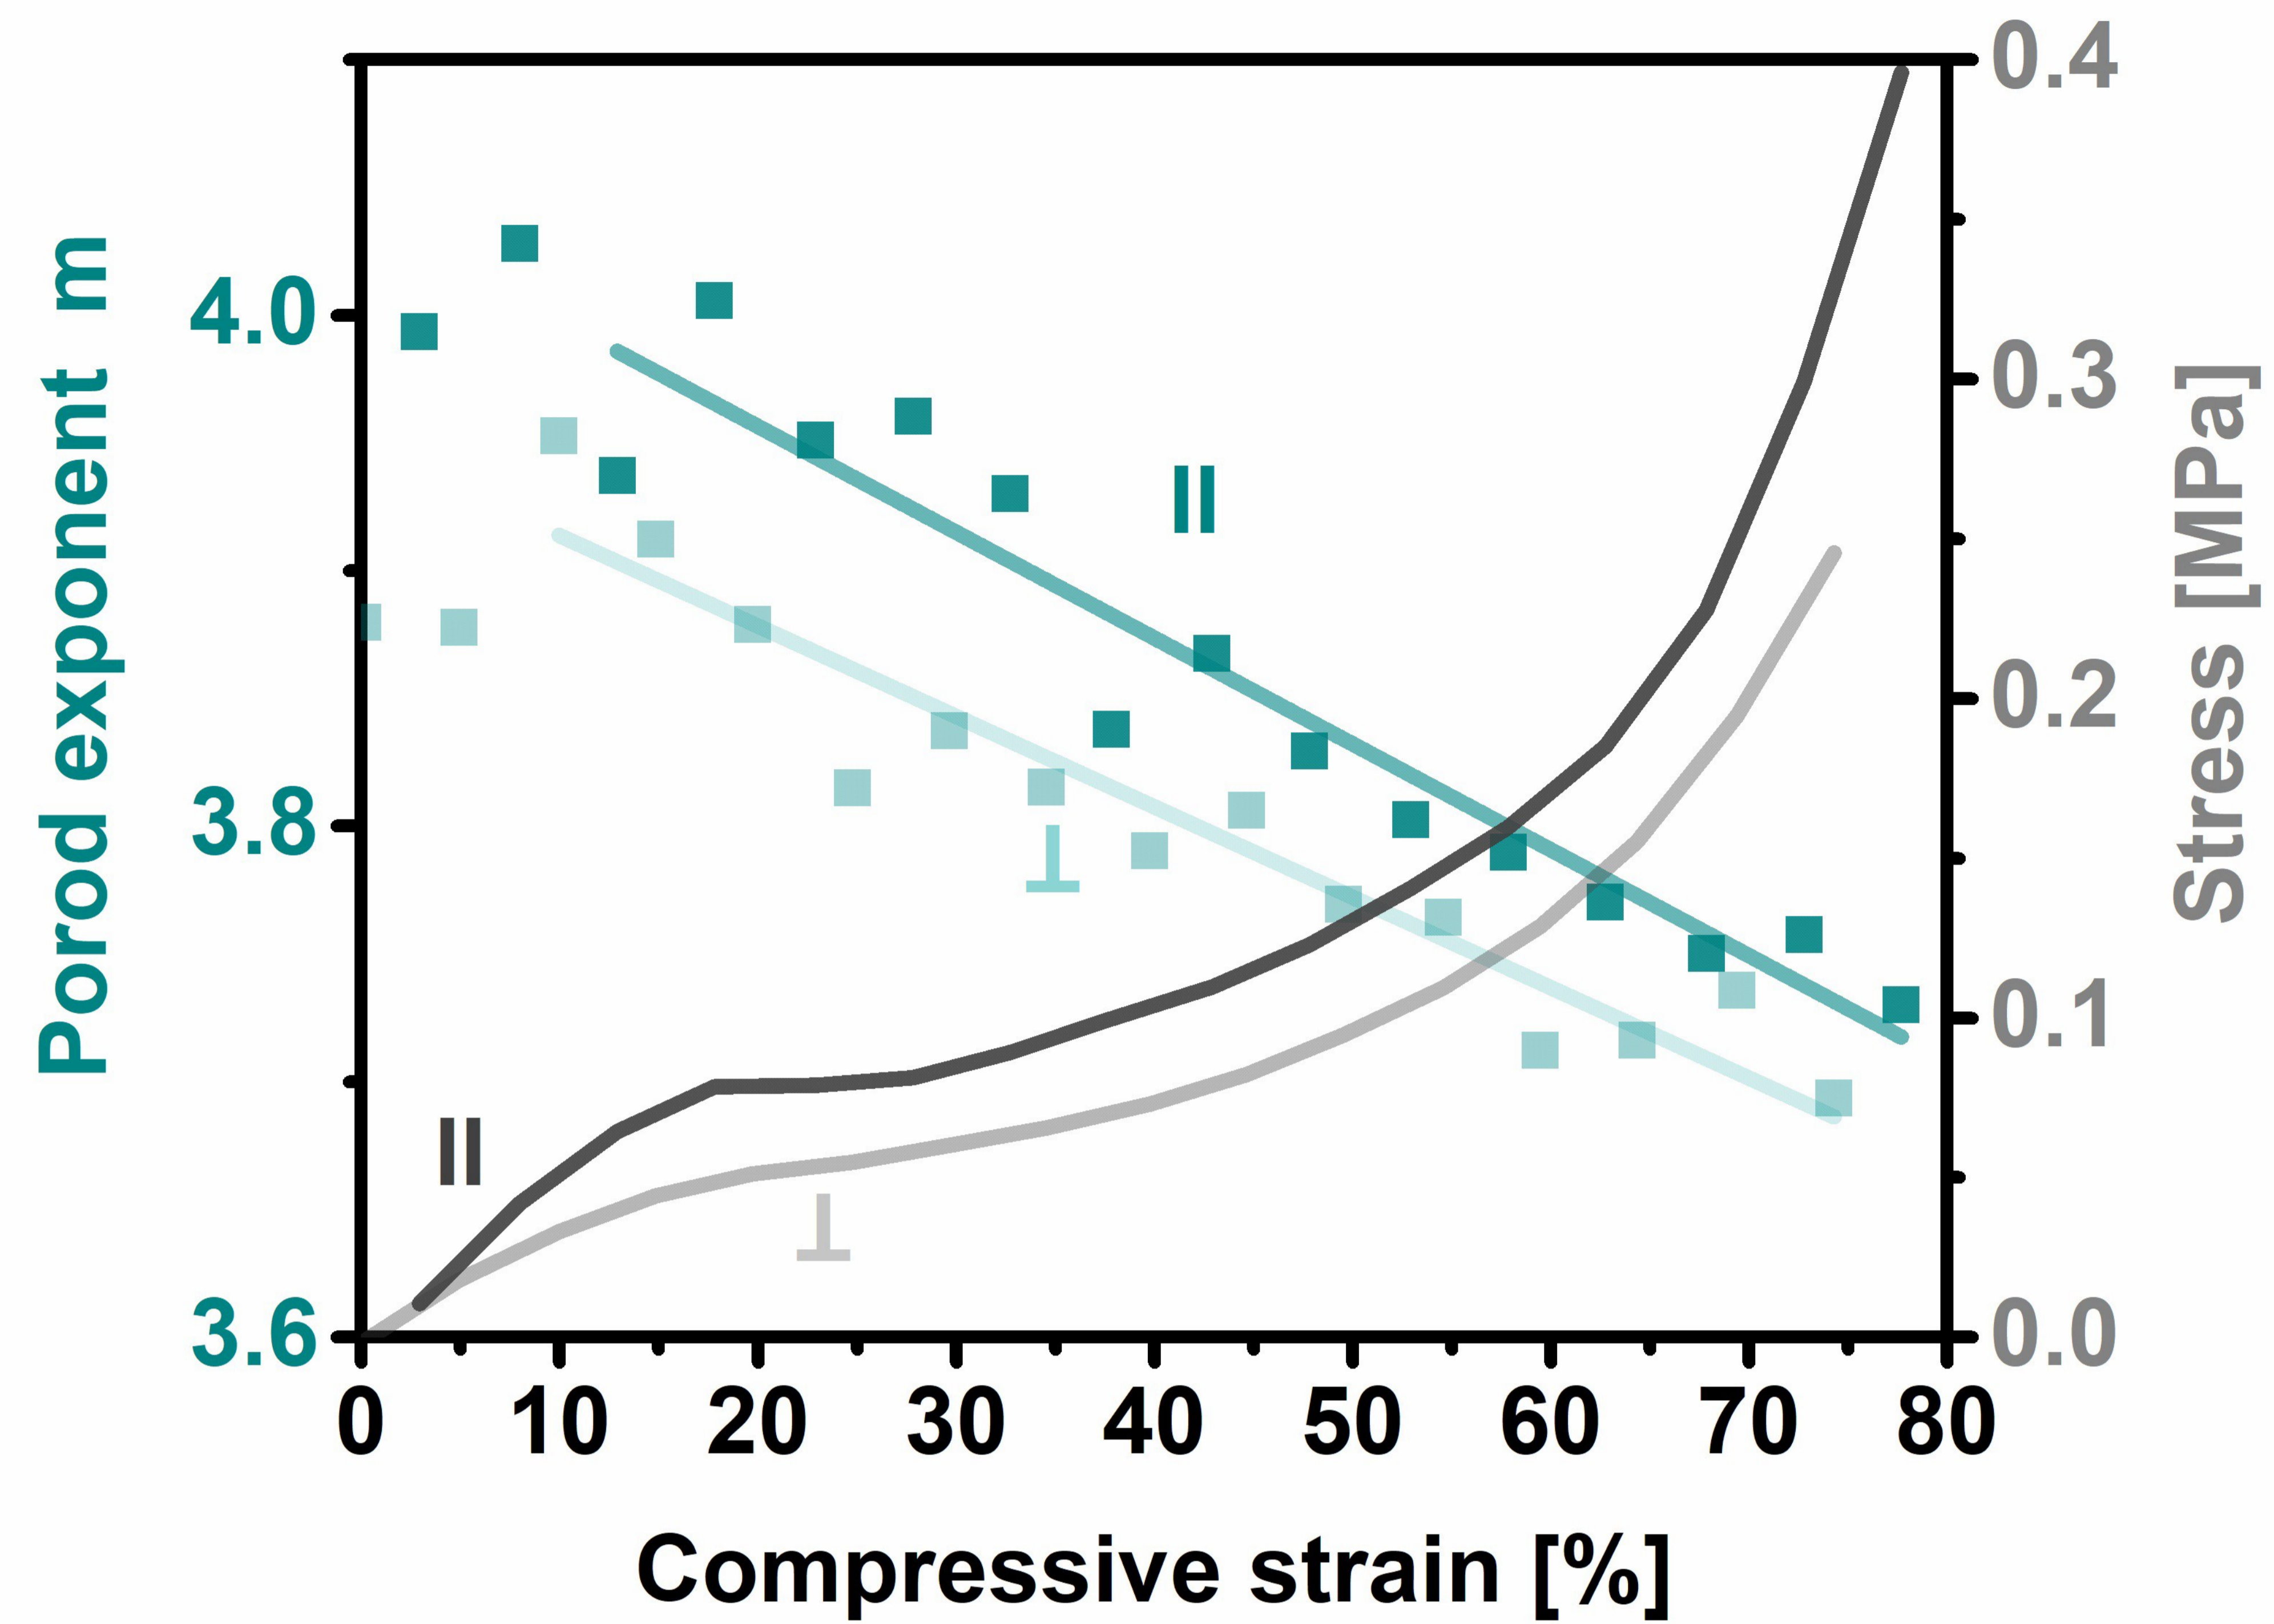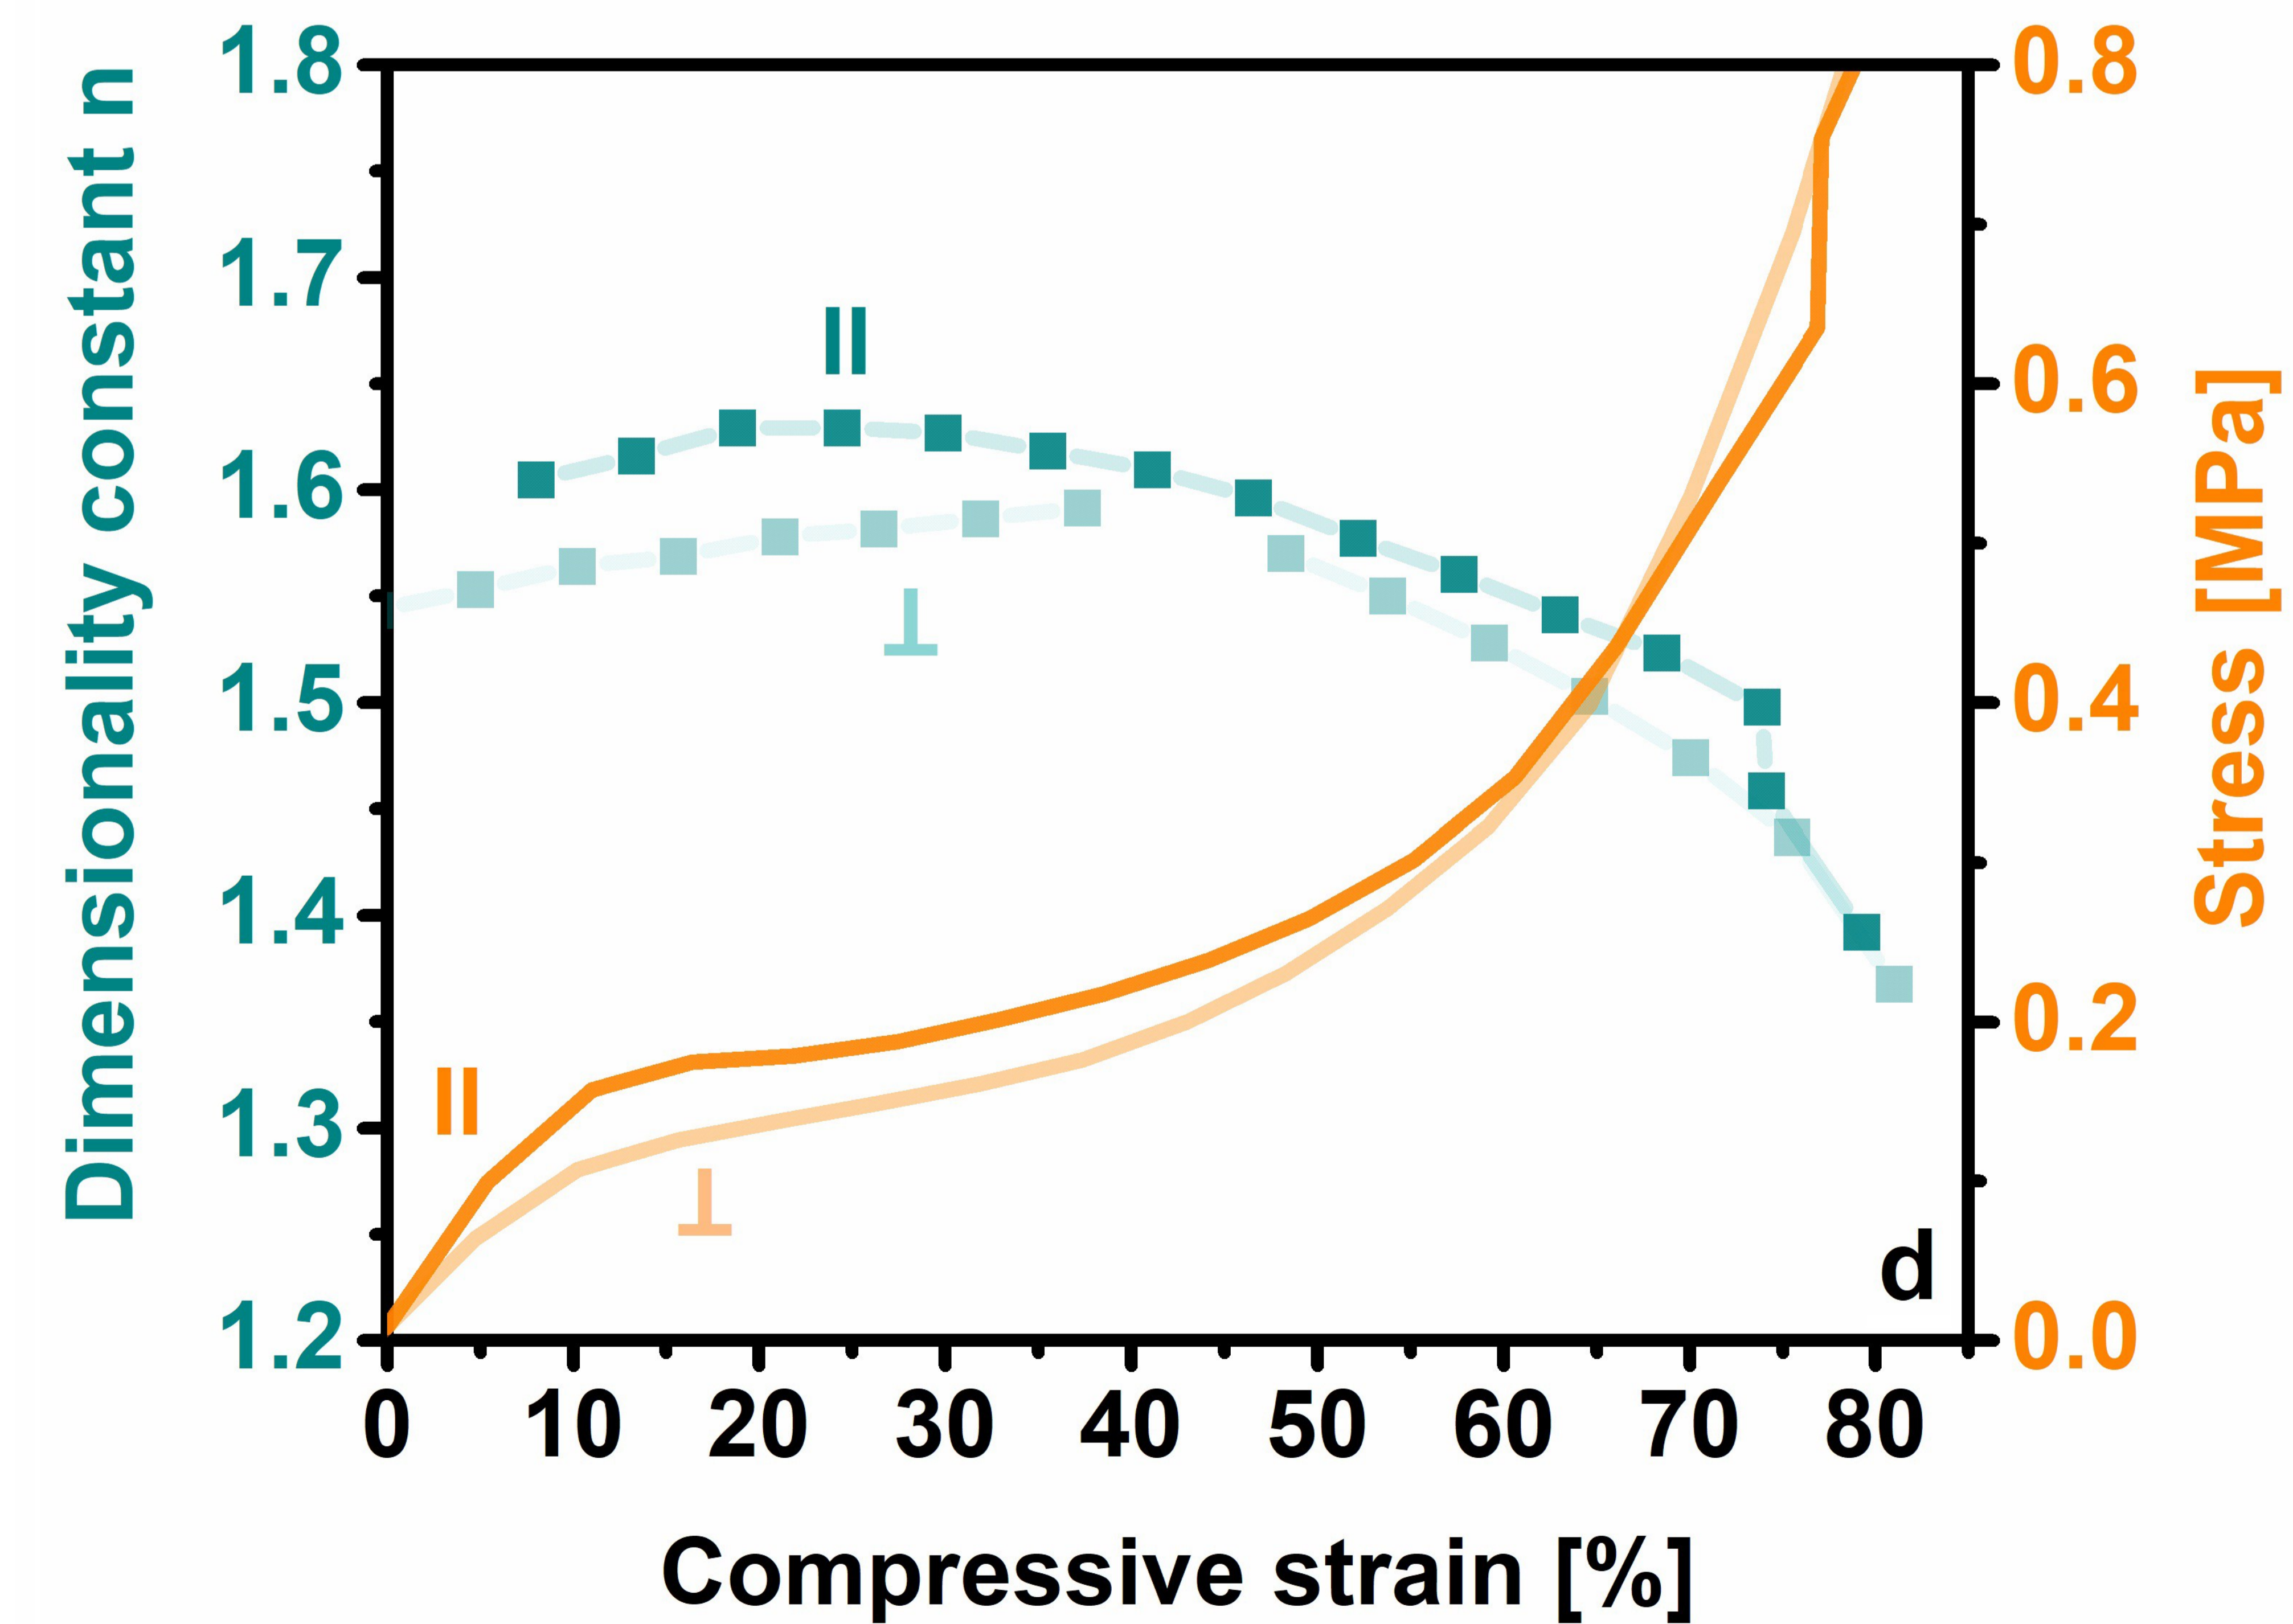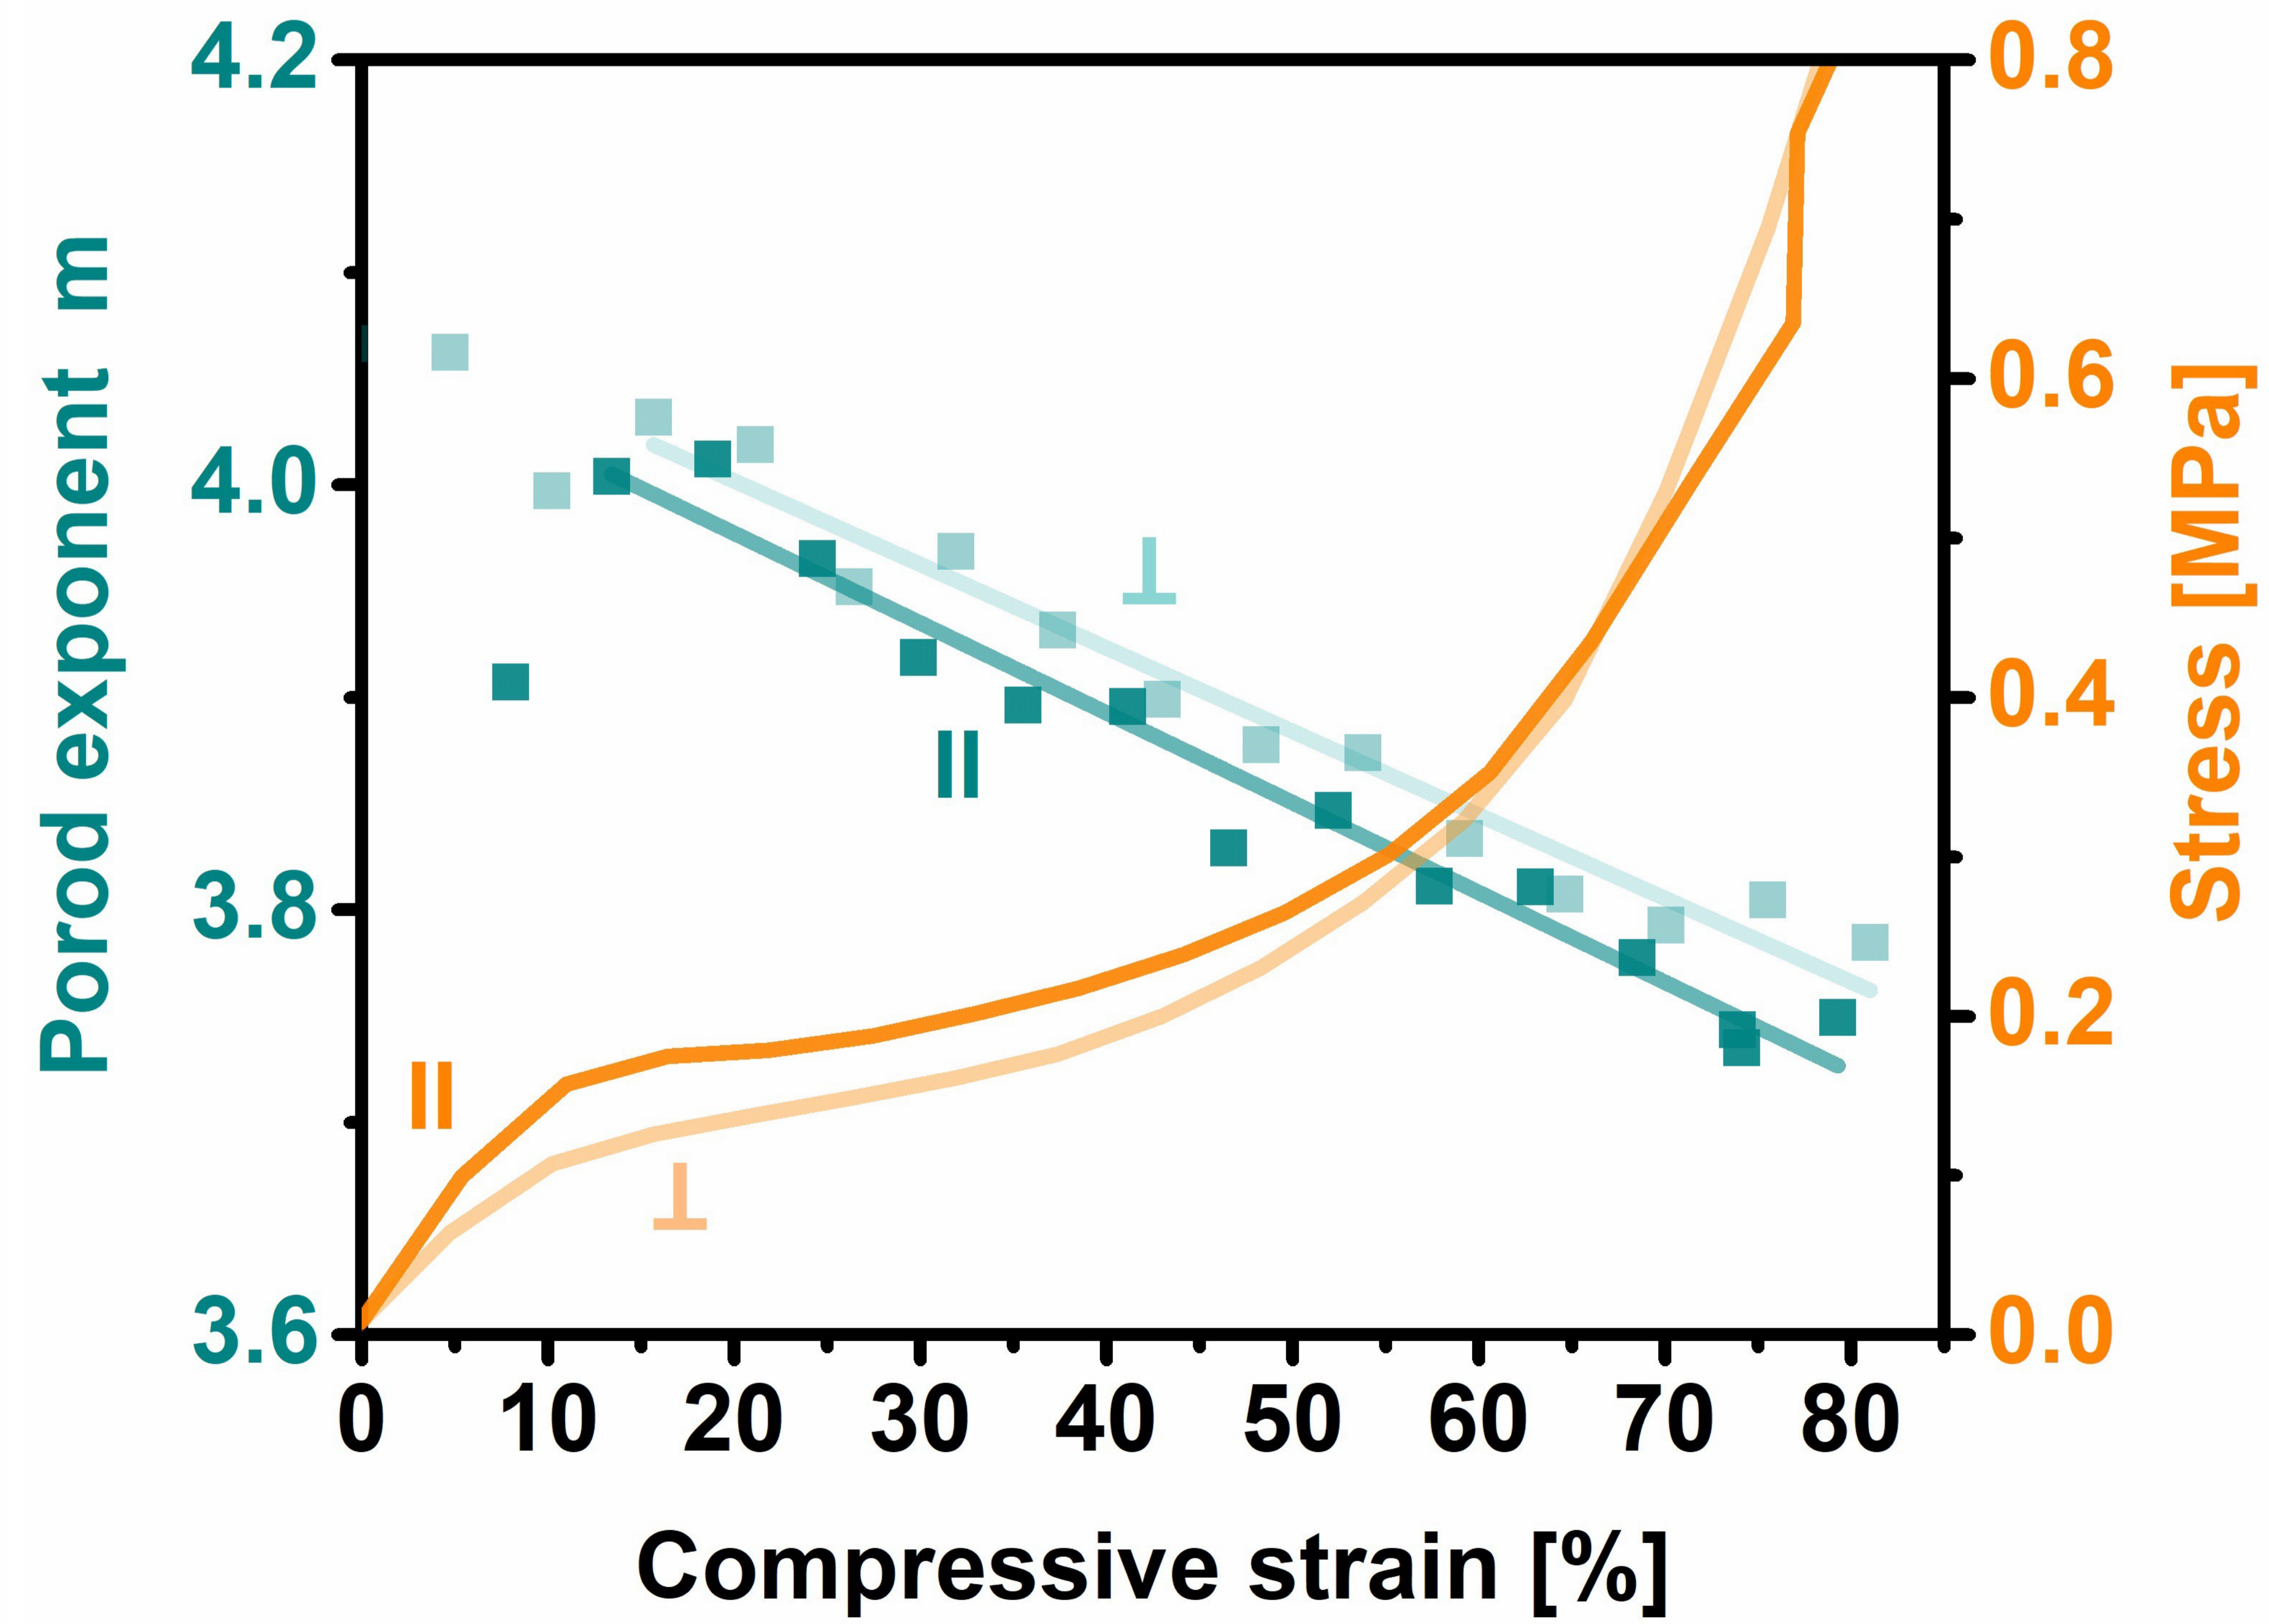

Supplement: c9sm01422e6.pdf [file c9sm01422e6.pdf]

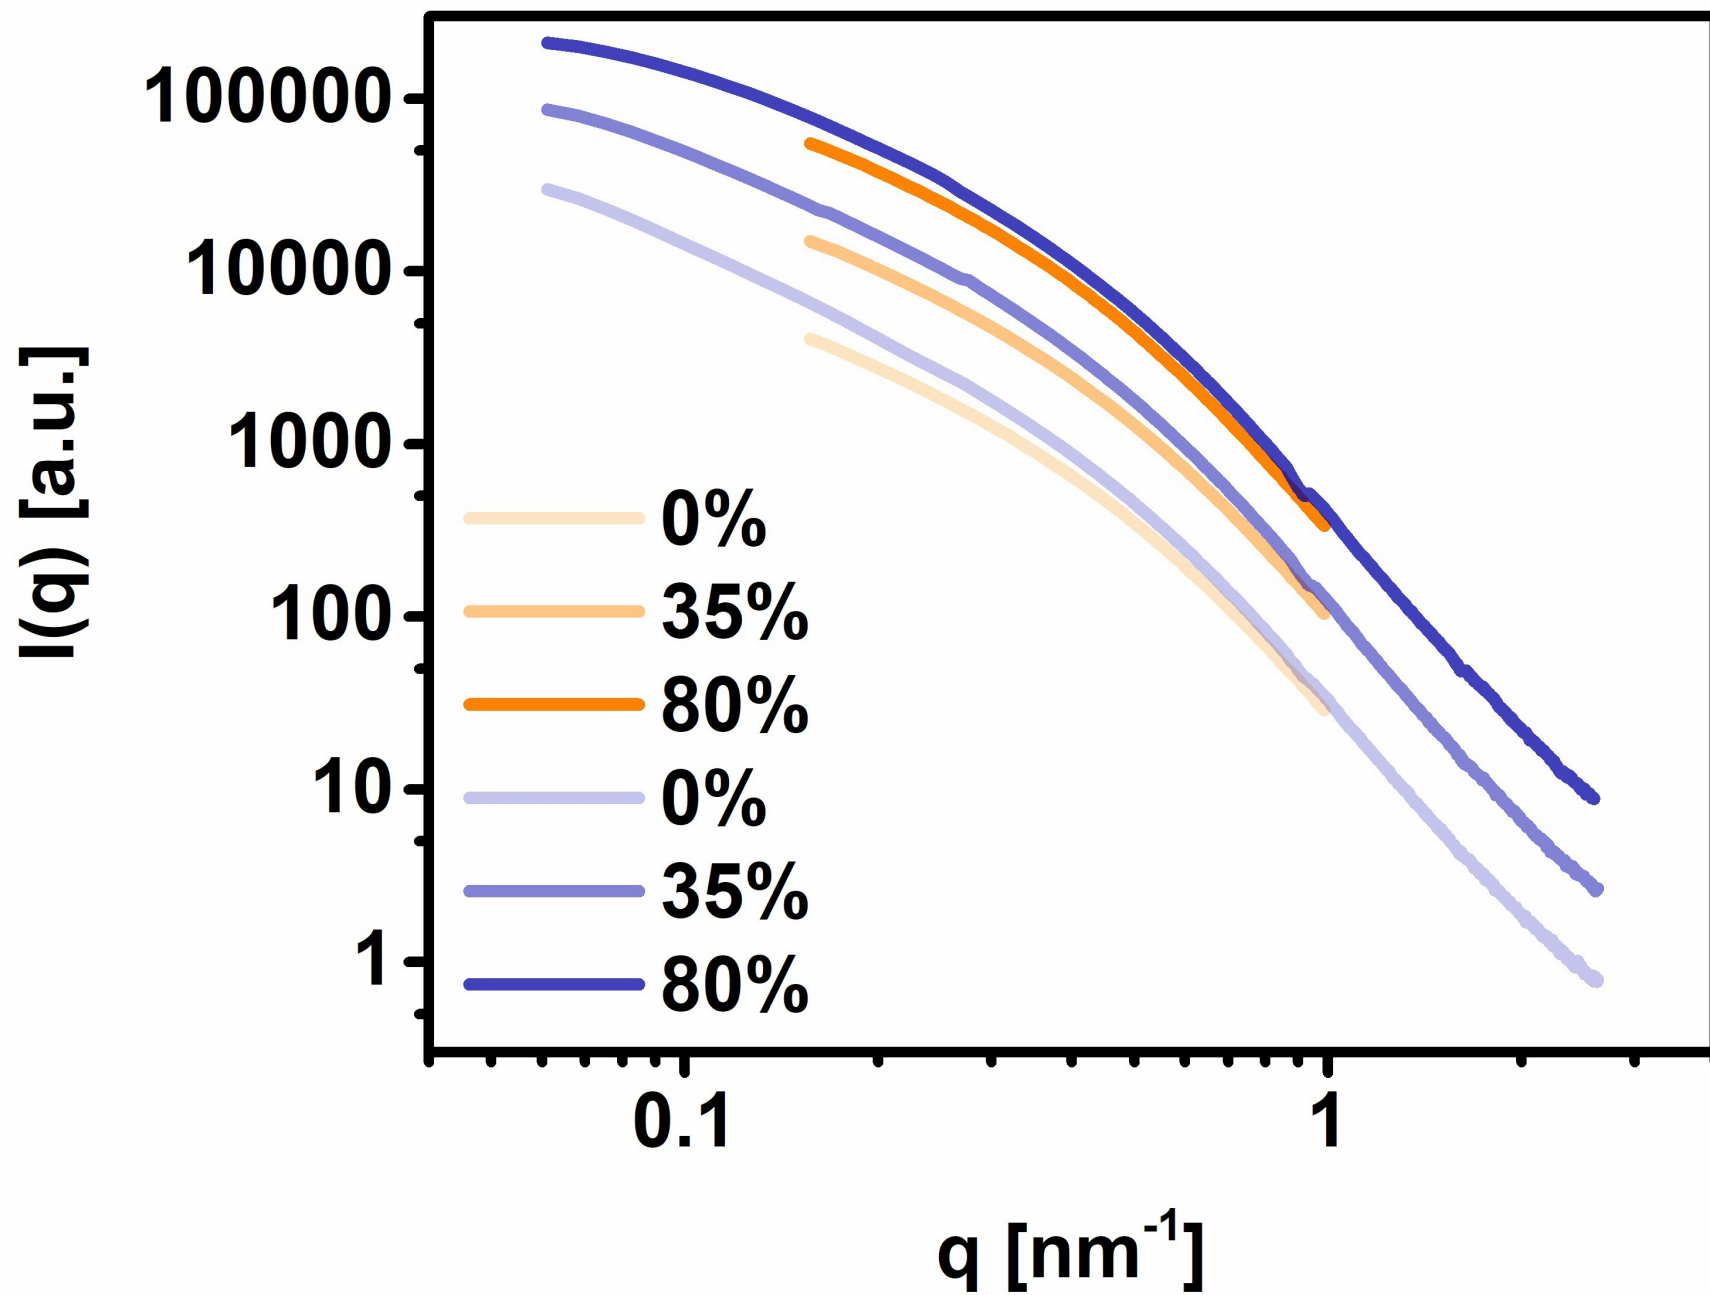

Supplement: c9sm01422e7.pdf [file c9sm01422e7.pdf]

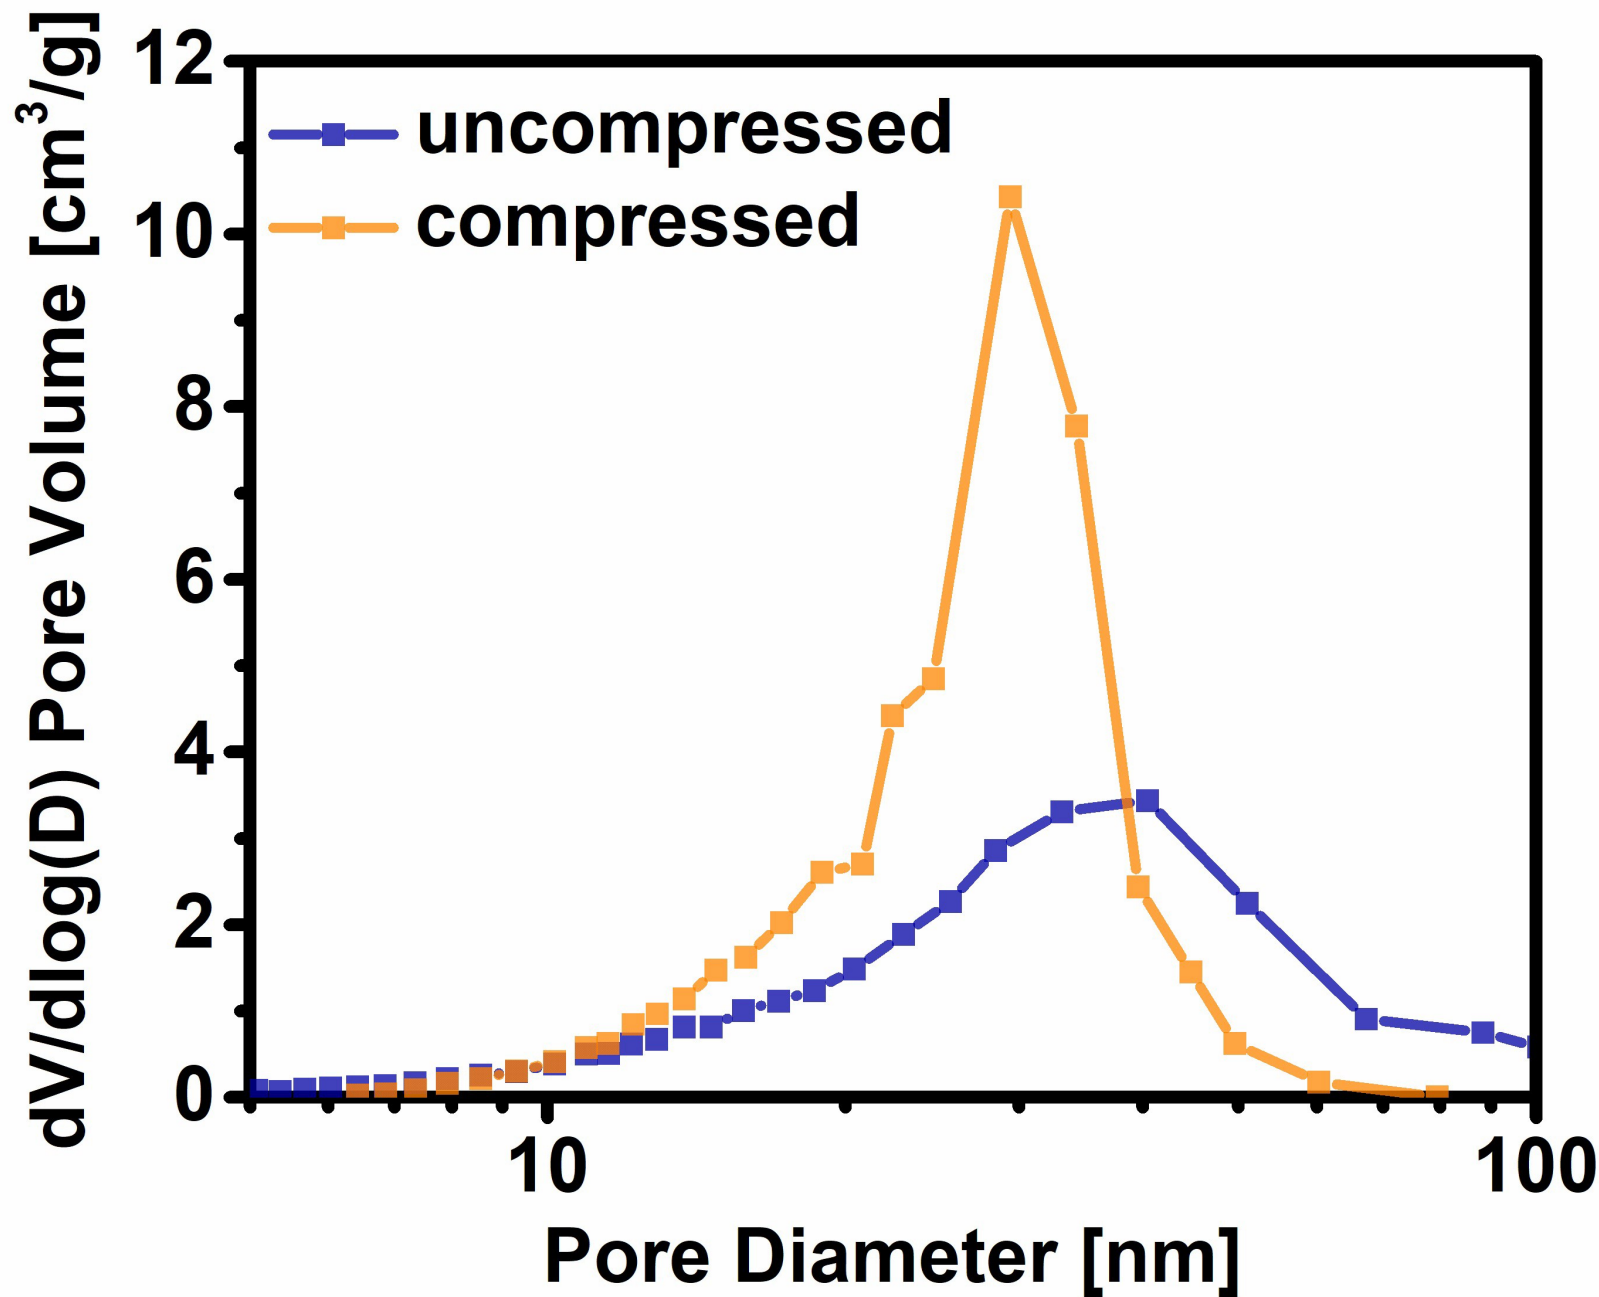

Supplement: c9sm01422e8.pdf [file c9sm01422e8.pdf]
